# Supplementary material for: Expanding the molecular toolkit for the homoacetogen Clostridium ljungdahlii
Source: PubMed Central journal article supplement (PMC4985741; doi:10.1038/srep31518), 2016-08-16
Supplement: srep31518-s1.pdf [file srep31518-s1.pdf]

1 **Supplemental information for:**

2

3 **Expanding the molecular toolkit for the homoacetogen**

4 ***Clostridium ljungdahlii***

5

6 B. Molitor, K. Kirchner, A.W. Henrich, S. Schmitz, M.A. Rosenbaum

7

8

9 This supplementary information contains additional information on plasmid  
10 construction and verification.

11

12

13

14 **Plasmid constructions**

15 Oligonucleotides used in this work are listed in Table S1. The plasmid pMTLts was  
16 constructed via Phosphorothioated Ligase Independent Cloning (PLICing) <sup>44</sup>.

17 Therefore, the temperature sensitive origin of replication pWV01ts was PCR amplified  
18 from pSS60 (a kind gift from Peter Dürre, Ulm, Germany) with phosphorothioated  
19 (PTO) primers (Eurofins MWG, Germany) pWVfor/ pWVre. The plasmid backbone

20 from pMTL85141 <sup>27</sup> was PCR amplified with PTO primers pMTLfor/pMTLrev. The

21 PLICing was performed as described before <sup>44</sup>. In detail, the used PTO primers  
22 introduced phosphorothioated, complementary overhangs as indicated in Table S1.

23 The PCR products were treated with iodine solution (100 mM in 99 % ethanol) at 70 °C

24 for 5 min, mixed in a 1:1 ratio, incubated for 5 min at room temperature and directly  
 25 transformed into competent *E. coli* DH5 $\alpha$ MCR.

26 The plasmid pMTLts-Bs2 was constructed using Gibson Assembly cloning (NEB,  
 27 USA). The vector backbone pMTLts was digested with *EcoRI* (NEB, USA), the  
 28 evoglow-Bs2-Cl gene was PCR amplified using primers thl\_pGlow\_Bs2\_fwd/  
 29 thl\_pGlow\_Bs2\_rev from pGlow-CK<sup>XN</sup>-Bs2 (Evocatal, Germany) and both DNA  
 30 fragments were used in a Gibson Assembly reaction to give pMTLts-Bs2 (Gibson  
 31 Assembly kit, NEB, USA).

32 For the construction of pANA1 the ampicillin resistance cassette from pUC18 was PCR  
 33 amplified with primers Amp\_for*Bam*HI/ Amp\_rev*Eco*RI and cloned into pJet2.1 giving  
 34 pJet\_AmpR. Subsequently, the *Bam*HI and *Eco*RI (NEB, USA) digested ampicillin  
 35 resistance cassette from pJet\_AmpR was subcloned into pAN1, digested with the  
 36 same enzymes, giving pANA1.

37

**Table S1.** Oligonucleotides used in this study

| name                    | sequence (5' -> 3')                                           |
|-------------------------|---------------------------------------------------------------|
| 1 pWVfor                | <u>CACCACGTAGTT</u> ATTGGGAGGTC                               |
| 2 pWVrev                | CGTCTATGAGCCTCTGAGAG                                          |
| 3 pMTLfor               | <u>GGCTCATAGACG</u> CTGCAATCGGATGCGATTAT                      |
| 4 pMTLrev               | <u>AACTACGTGGT</u> GTGCAATTGTATTGCTATTAATCGC                  |
| 5 thl_pGlow_Bs2_fwd     | catatgaccatgattacgAGCTCCTGCAGGTCGACTTTTTAAC                   |
| 6 thl_pGlow_Bs2_rev     | cgggtaccgagctcgTTATTCAAGAAGCTTTTCATATTCTTTTTGCTTTGTTATATCATTC |
| 7 Amp_for <i>Bam</i> HI | <u>GGATCC</u> GGTCTGACGCTCAGTGAAC                             |
| 8 Amp_rev <i>Eco</i> RI | <u>GAATTC</u> GAAAGGGCCTCGTGATACGC                            |
| 9 ColEI_for             | CCACCACTTCAAGAACTCTG                                          |
| 10 ColEI_rev            | GCGGTAATACGGTTATCCAC                                          |
| 11 fdhA_for             | AGTGCAGCGTATTTCGTAAGG                                         |
| 12 fdhA_rev             | TAATGAGCCACGTCGTGTTG                                          |
| 13 ctfAB_for            | ATAGGCAGCAACCCAGATAC                                          |
| 14 ctfAB_rev            | TTTAGGACTAGCGCCCATTC                                          |
| 17 nifC_for             | TCGGTATTTCAGGTGGTTCTC                                         |
| 18 nifC_rev             | AAAGTGGCTCCAAACTCTCC                                          |
| 19 luxS_for             | ACAAAGGTTAAGGCACCATATGT                                       |
| 20 luxS_rev             | ACCTGTTTTGCATGACTCTTAGCT                                      |

38 Underlined sequences represent phosphorothioated sequences; small letters represent overhangs for Gibson  
 39 assembly; italic, underlined sequences represent restriction enzyme cutting sites

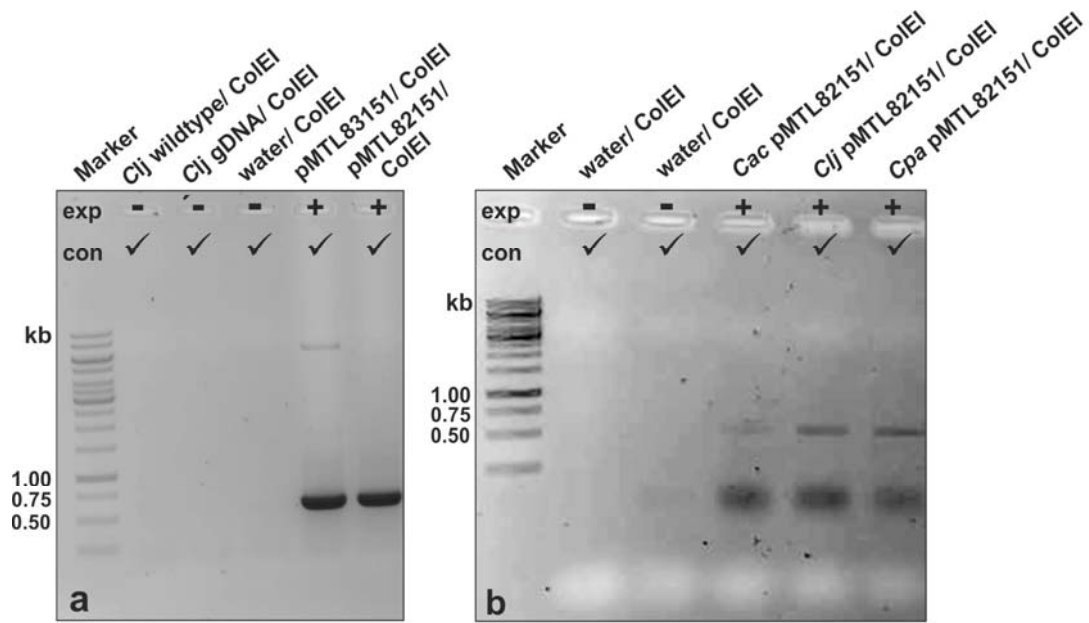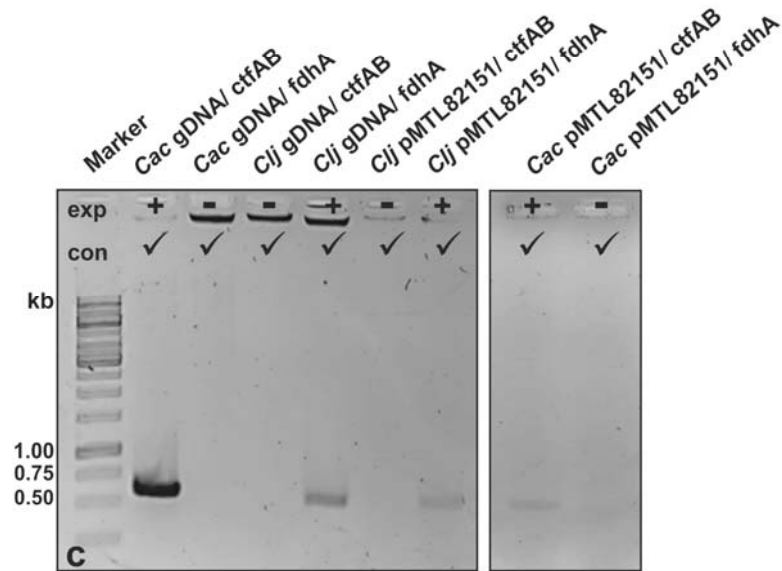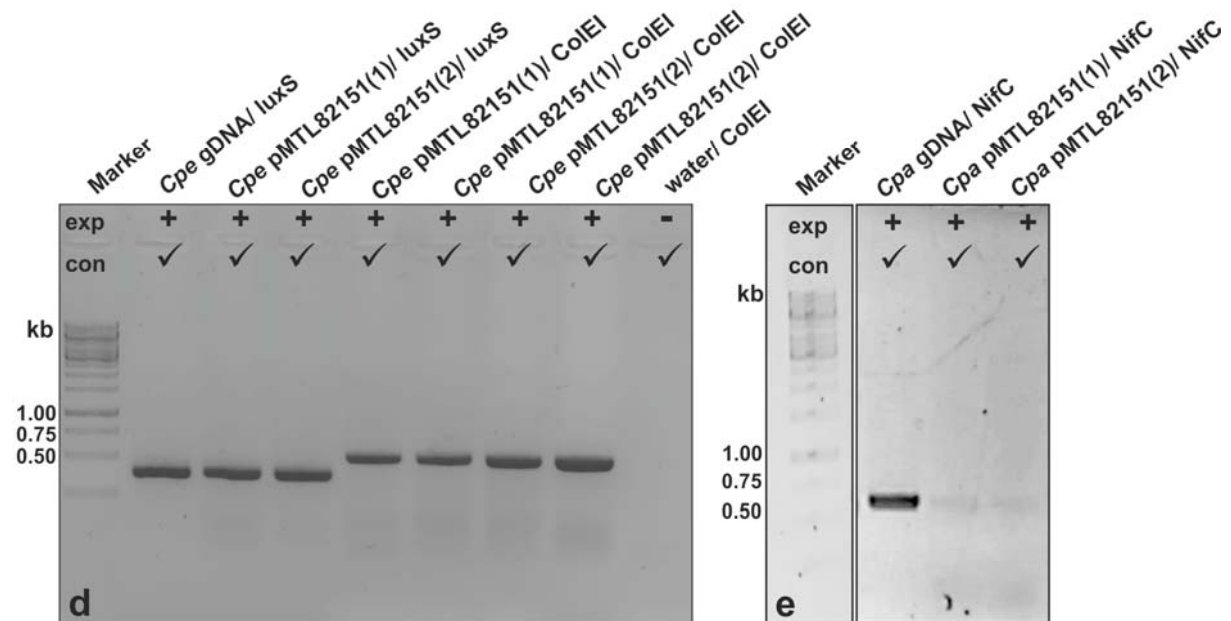

41 **Figure S1.** Strain specific PCR and plasmid PCR to prove a successful transformation.  
42 Used primers are listed in Table S1. *Cac*, *C. acetobutylicum*; *Clj*, *C. ljungdahlii*; *Cpa*,  
43 *C. pasteurianum*; *Cpe*, *C. perfringens*. Marker, GeneRuler 1kb DNA Ladder  
44 (Fermentas): a = controls; b = plasmid confirmation strains *Cac*, *Clj*, *Cpa*; c = strain  
45 confirmation strains *Cac*, *Clj*; d = strain and plasmid confirmation *Cpe*; e = strain  
46 confirmation *Cpa*. (exp = expected result; con = confirmed).
